# Supplementary material for: Simulating Hunting Effects on the Wild Boar Population and African Swine Fever Expansion Using Agent-Based Modeling
Source: MDPI journal article supplement (doi:10.3390/ani13020298), 2023-01-14
Supplement: s1 [file s1]

## Supplementary Figures & Tables

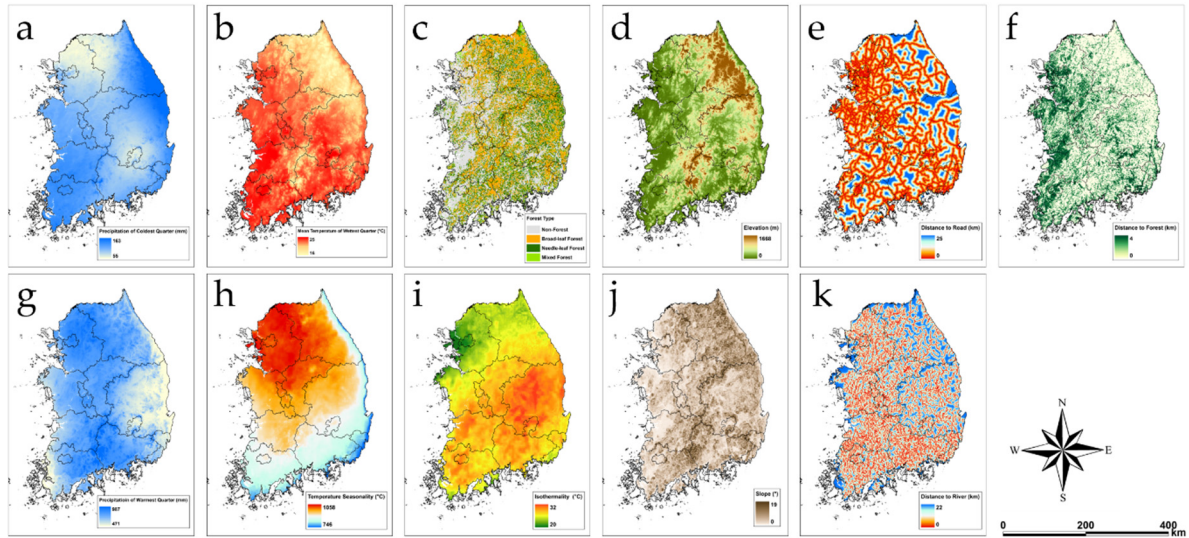

**Figure S1:** The spatial distribution of variables used for MaxEnt model. (a) Precipitation of Coldest Quarter (b) Mean Temperature of Wettest Quarter (c) Forest type (d) Elevation (e) Distance to road (f) Distance to forest (g) Precipitation of Warmest Quarter (h) Temperature Seasonality (i) Isothermality (j) Slope (k) Distance to river.

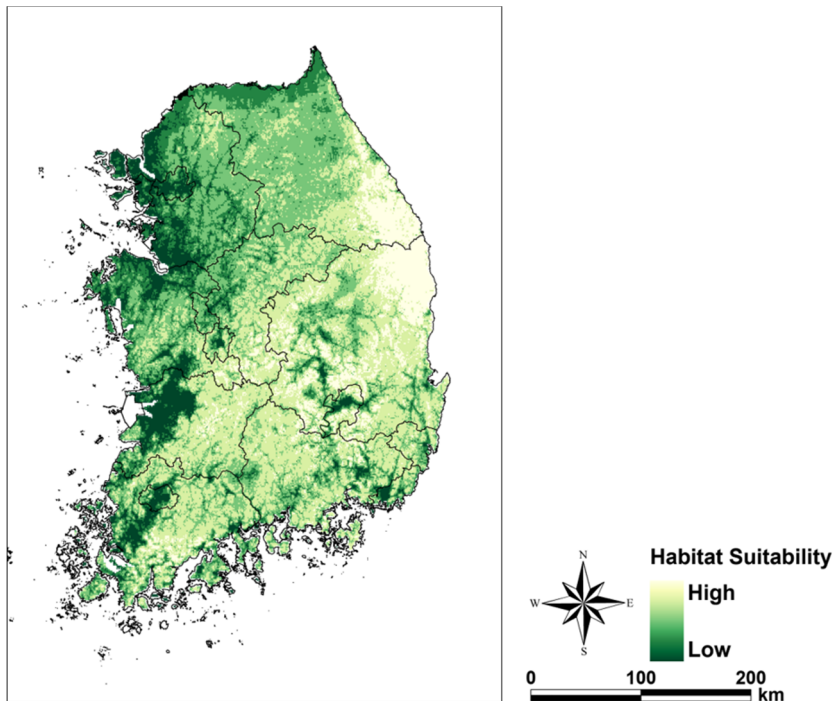

**Figure S2:** The results of wild boar habitat suitability (Background world).

**Table S1:** The variables used for MaxEnt model.

| Variable                               | Unit | Value<br>(Min-Max) |
|----------------------------------------|------|--------------------|
| Elevation                              | m    | 0-2555             |
| Precipitation of Coldest Quarter       | mm   | 55-163             |
| Forest type                            | -    | Categorical        |
| Distance to Forest                     | km   | 0-4                |
| Temperature Seasonality                | -    | 746-1058           |
| Isothermality                          | -    | 20-32              |
| Slope                                  | °    | 0-19               |
| Precipitation of Warmest Quarter       | mm   | 471-987            |
| Distance to road                       | km   | 0-25               |
| Mean Temperature of Wettest<br>Quarter | °C   | 16-25              |
| Distance to River                      | km   | 0-22               |
